# Supplementary material for: Induction of Viral Mimicry Upon Loss of DHX9 and ADAR1 in Breast Cancer Cells
Source: PubMed Central journal article supplement (PMC10993856; doi:10.1158/2767-9764.crc-23-0488), 2024-04-04
Supplement: crc-23-0488-s05.pdf [file crc-23-0488-s05.pdf]

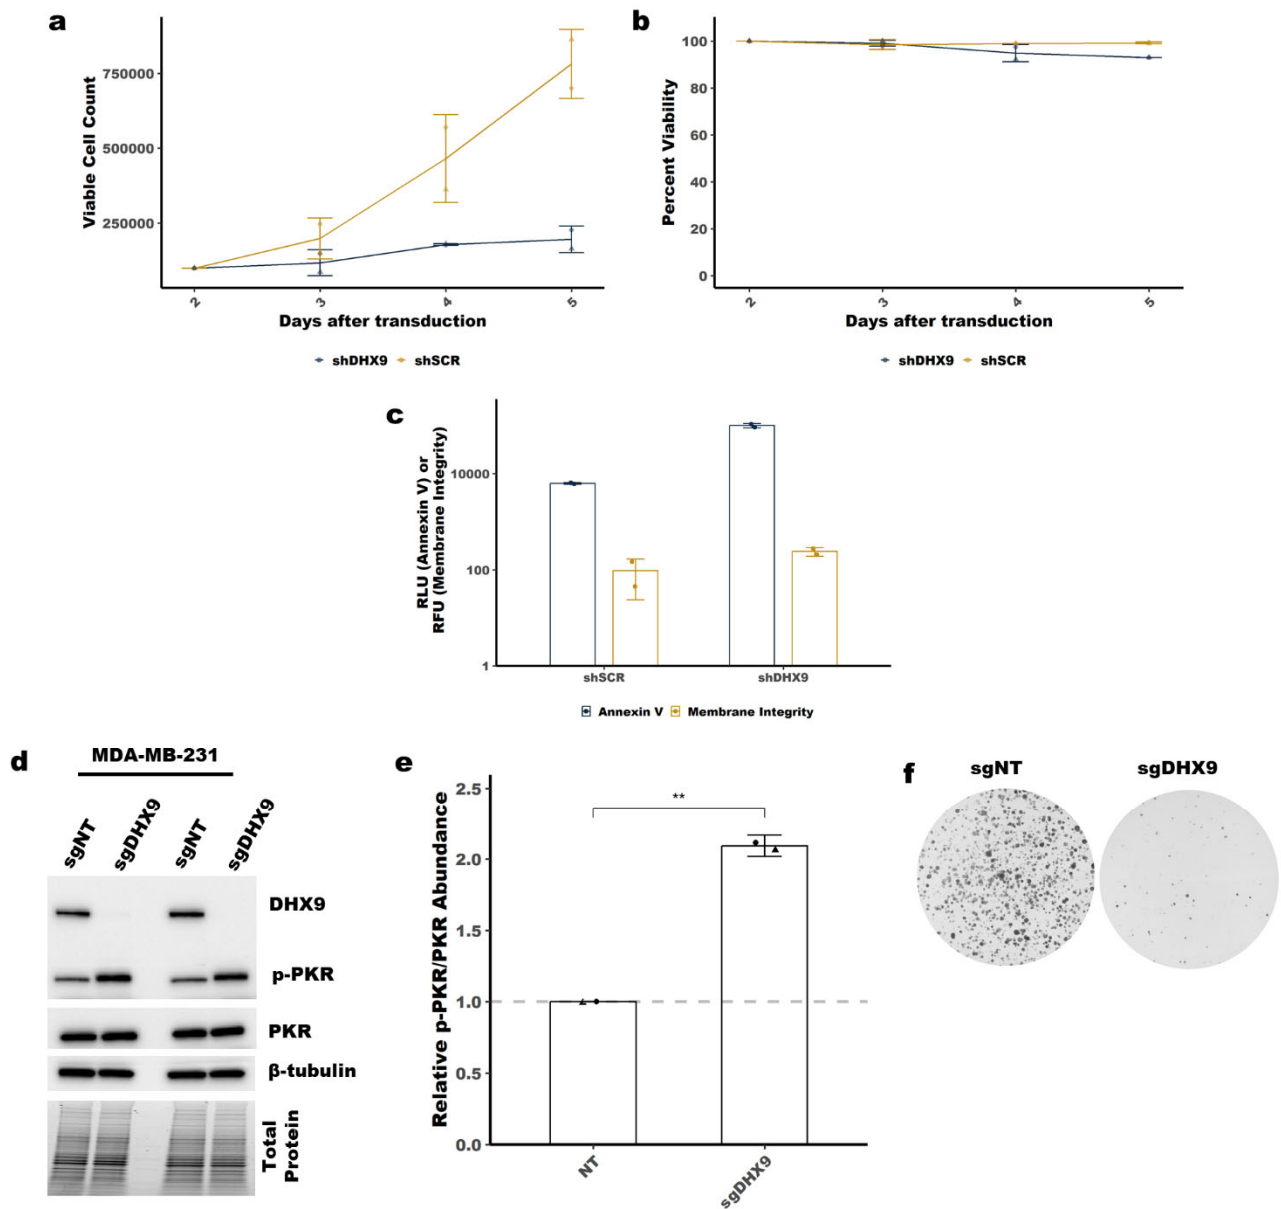

**Figure S3:**

**a** Cell count and **b** viability of cells as measured by trypan blue exclusion assay following knockdown of DDX9 in MDA-MB-231. **c** Assessment of apoptosis (Annexin V) and necroptosis (Membrane Integrity) by the Promega RealTime-Glo Apoptosis Assay, performed per manufactures instructions. Annexin V is measured by a NanoBit Luciferase system and is reported as Relative Luminescence Units (RLU). The necroptosis marker used in the kit is a fluorescent dye that labels cells with disrupted membrane integrity and is reported as Relative Fluorescence Units (RFU). **d** Immunoblot for DDX9, p-PKR, PKR and  $\beta$ -tubulin following knockout of DDX9 by CRISPR-Cas9 in MDA-MB-231, two replicates are shown, quantification of the p-PKR abundance is shown in **e**. **f** Representative foci formation assay results for knockout DDX9 in MDA-MB-231. Bars in panels **c** and **e** or the line in panels **a** and **b** represent the average of at two replicates, error bars are +/- SD. \*\*  $p < 0.01$ . P-values determined by Dunnett's test.
