# Supplementary material for: Induction of Viral Mimicry Upon Loss of DHX9 and ADAR1 in Breast Cancer Cells
Source: PubMed Central journal article supplement (PMC10993856; doi:10.1158/2767-9764.crc-23-0488), 2024-04-04
Supplement: crc-23-0488-s06.pdf [file crc-23-0488-s06.pdf]

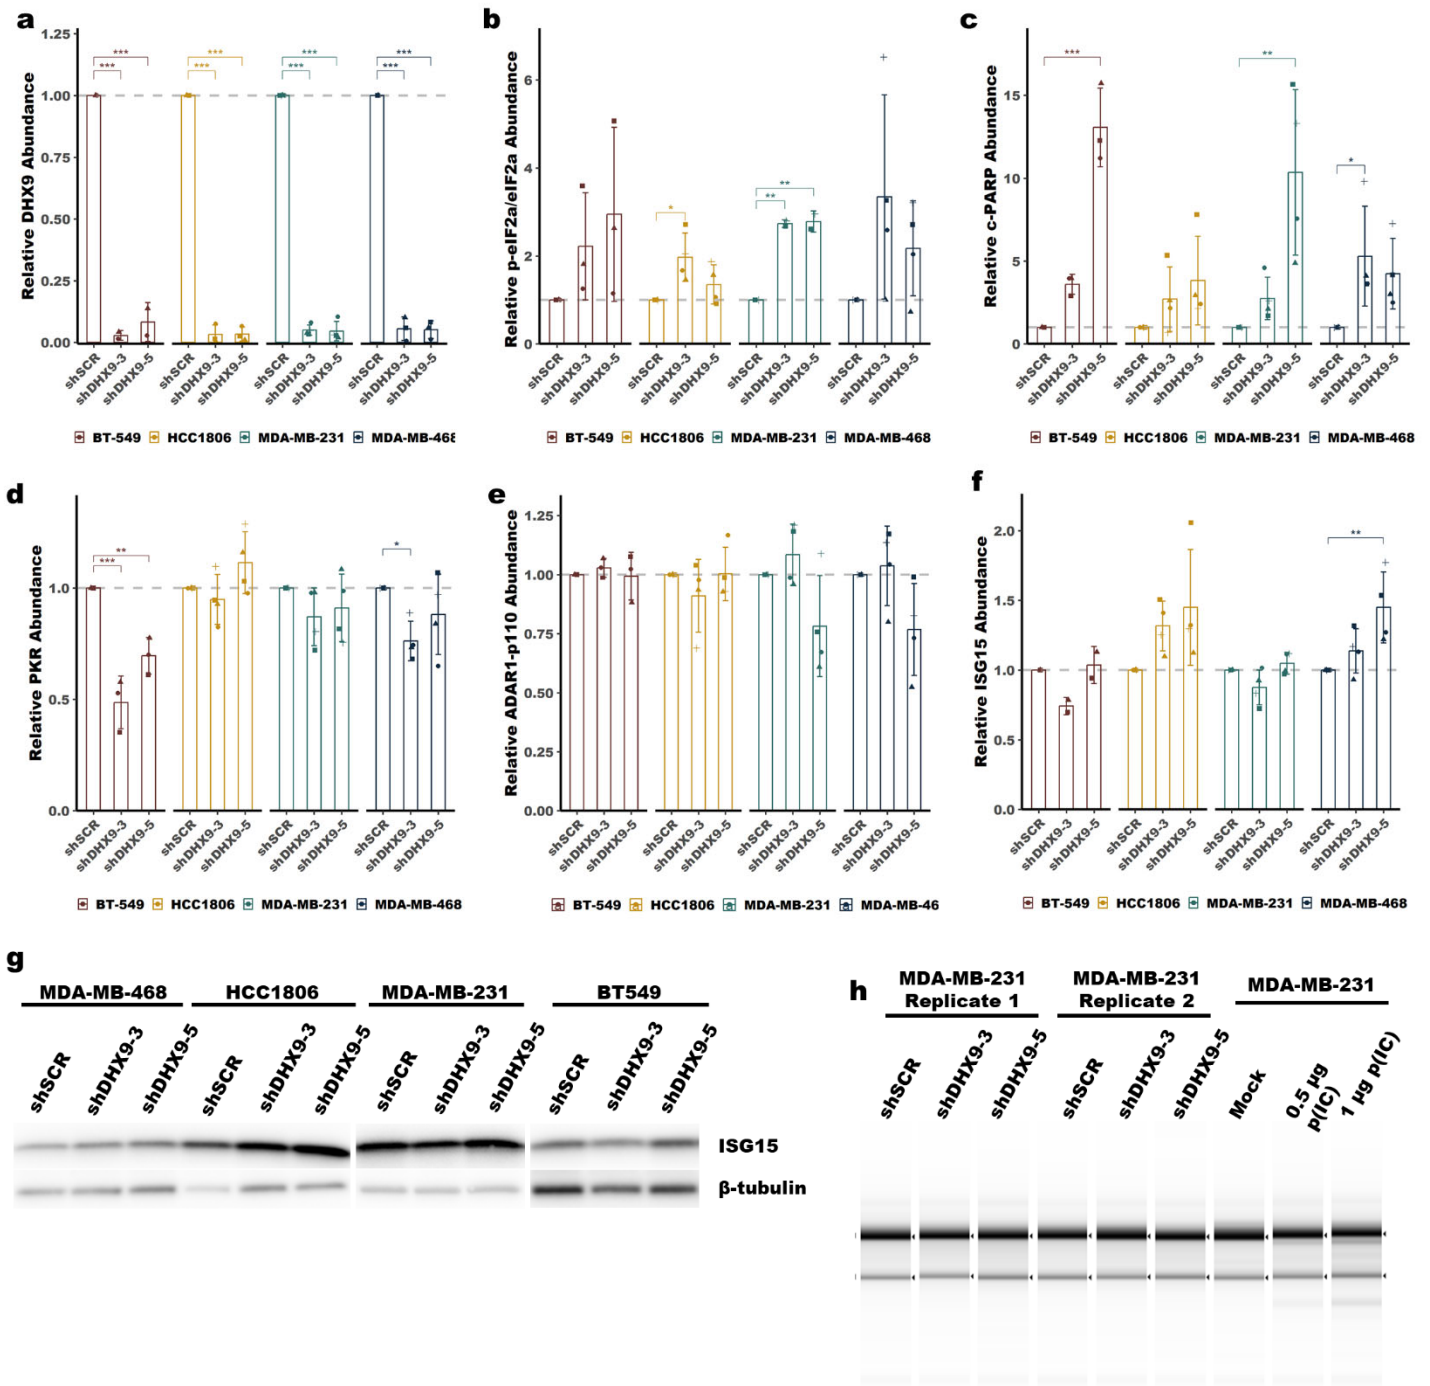

**Figure S4:**

**a-e** Quantification of the immunoblots shown in Figure 3g. **f** Quantification of the immunoblots shown in panel g. **g** Representative immunoblot for ISG15 and  $\beta$ -tubulin in TNBC cell lines following knockdown of DHX9. Immunoblots from additional experiments can be found in the Source Data Figures. **h** Assessment of rRNA integrity in MDA-MB-231 following knockdown of DHX9 or transfection with poly(I:C) (p(I:C)). Bars represent the average of at least three replicates **a-f**, error bars are  $\pm$  SD. \*  $p < 0.05$ , \*\*  $p < 0.01$ , \*\*\*  $p < 0.001$ . P-values determined by Dunnett's test.
