# Supplementary material for: Induction of Viral Mimicry Upon Loss of DHX9 and ADAR1 in Breast Cancer Cells
Source: PubMed Central journal article supplement (PMC10993856; doi:10.1158/2767-9764.crc-23-0488), 2024-04-04
Supplement: crc-23-0488-s08.pdf [file crc-23-0488-s08.pdf]

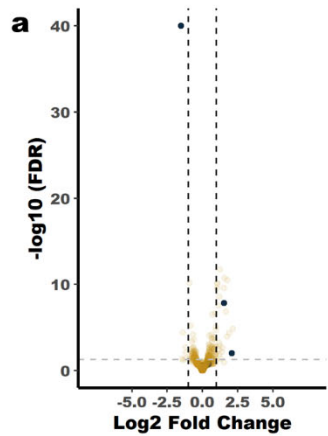

**ADAR Knockdown  
MCF-7**

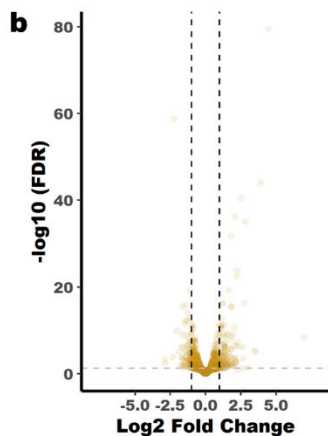

**DHX9 Knockdown  
MCF-7**

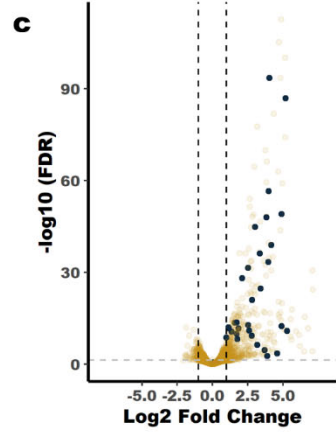

**shADAR1\*shDHX9 Interaction  
MCF-7**

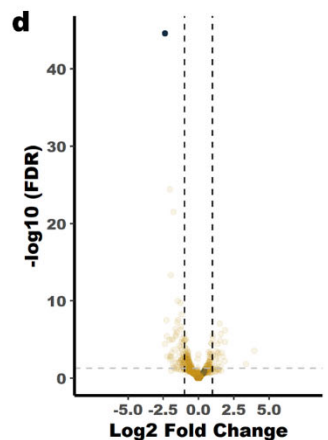

**ADAR Knockdown  
SK-BR-3**

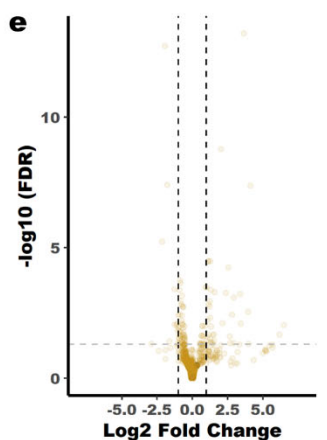

**DHX9 Knockdown  
SK-BR-3**

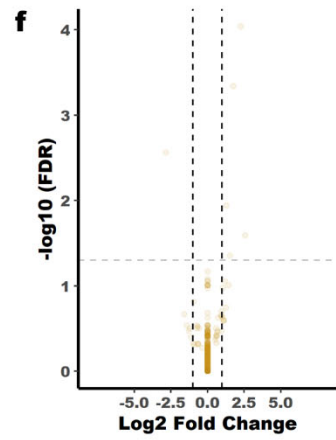

**shADAR1\*shDHX9 Interaction  
SK-BR-3**

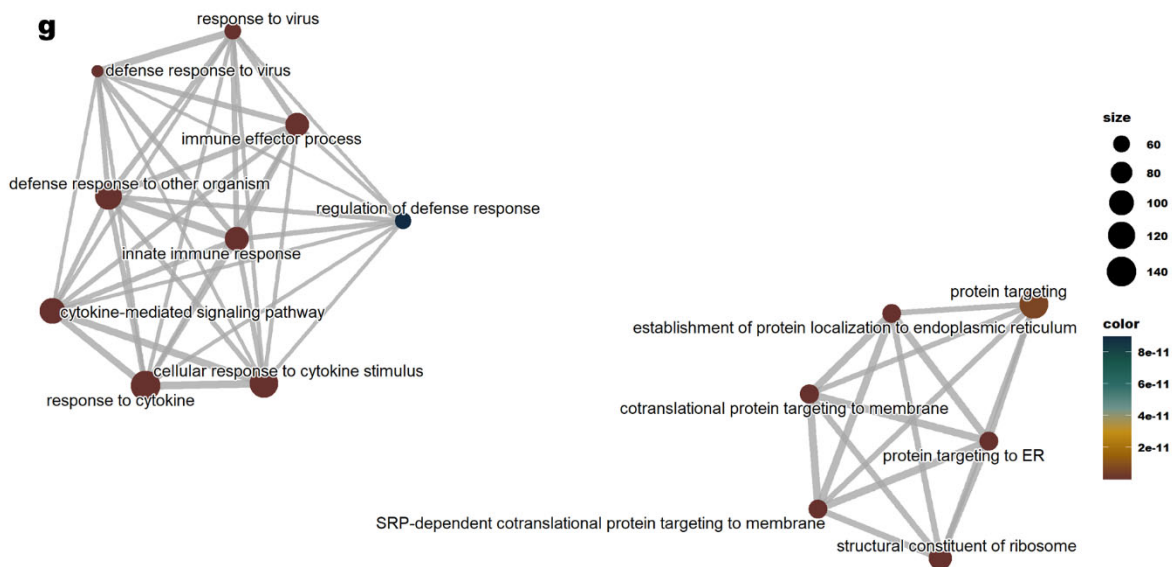

## Figure S6:

**a-f** Volcano plots showing changes in RNA expression upon knockdown of DHX9 and/or ADAR1 in MCF-7 or SK-BR-3. For panels **c** and **f**, fold-change of RNA expression was determined using an interaction term between ADAR1 and DHX9 knockdown. For all volcano plots, Core ISGs have been labeled. The ISG with lower expression upon knockdown of ADAR1 in MCF-7 and SK-BR-3 **a** and **d** is ADAR1. **g** Enrichment map for the GO terms described in Figure 5b and Supplementary Table 14 (based on combined knockdown of ADAR1 and DHX9 in MCF-7). The GO terms in the left cluster are upregulated following knockdown of DHX9 and ADAR1, while the terms in the right cluster are downregulated. The size of each point represents the number of genes associated with the GO term and the color is the FDR corrected p-value.
