# Supplementary material for: Induction of Viral Mimicry Upon Loss of DHX9 and ADAR1 in Breast Cancer Cells
Source: PubMed Central journal article supplement (PMC10993856; doi:10.1158/2767-9764.crc-23-0488), 2024-04-04
Supplement: crc-23-0488-s13.pdf [file crc-23-0488-s13.pdf]

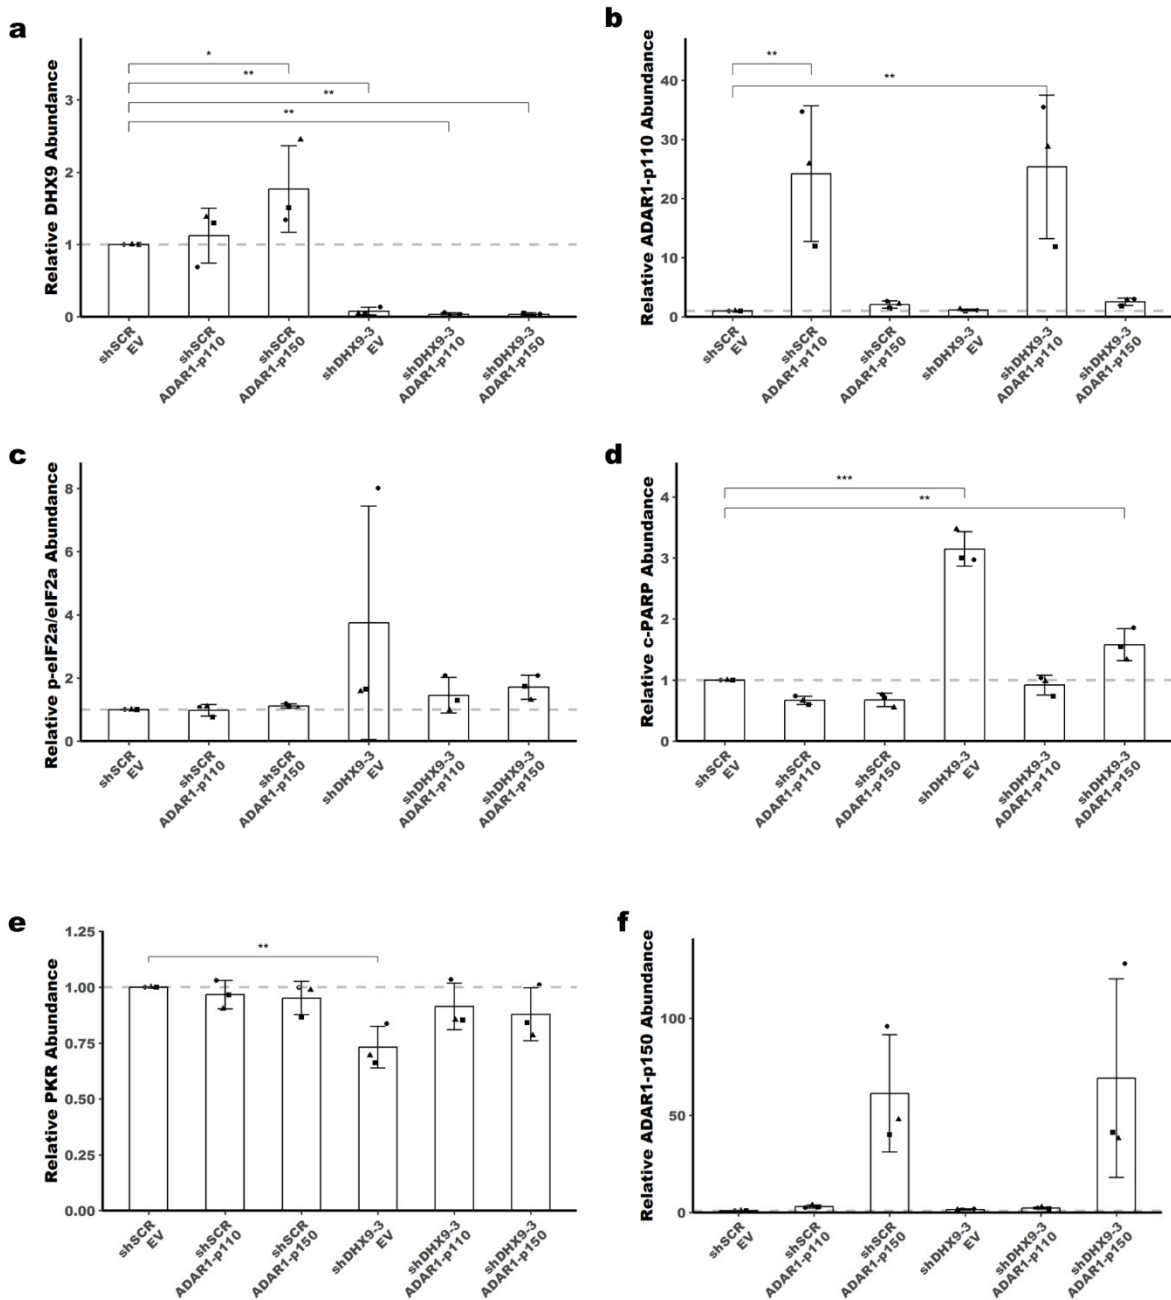

**Figure S11:**

**a-f** Quantification of the immunoblot in Figure 7a. Bars represent the average of at least three replicates, error bars are +/- SD. \*  $p < 0.05$ , \*\*  $p < 0.01$ , \*\*\*  $p < 0.001$ . P-values determined by Dunnett's test.
